# Supplementary material for: Imported Hyalomma ticks in the Netherlands 2018–2020
Source: Parasit Vectors. 2021 May 7;14:244. doi: 10.1186/s13071-021-04738-x (PMC8106226; doi:10.1186/s13071-021-04738-x)
Supplement: Supplementary file 1 — Additional file 1: Table S1. Graphic image of all reports to the CMV, including Hyalomma (June 2019–December 2020). Table S2. Hyalomma sp. GenBank® accession numbers (n=77) used for the cluster analysis. [file 13071_2021_4738_MOESM1_ESM.xlsx]

## Sheet: Table S1. All reports
		month	June 2019	July 2019	Aug 2019	Sept 2019	Oct 2019	Nov 2019	Dec 2019	Jan 2020	Feb 2020	March 2020	Apr 2020	May 2020	June 2020	July 2020	Aug 2020	Sept 2020	Oct 2020	Nov 2020	Dec 2020	Total
		something else	0	13	6	9	16	0	1	2	1	3	4	7	9	4	10	5	5	4	3	102
		Hyalomma sp.	0	3	7	1	0	0	0	0	0	0	0	1	0	0	3	1	0	0	0	16
		total	0	16	13	10	16	0	1	2	1	3	4	8	9	4	13	6	5	4	3	118

## Sheet: Table S2. Used GenBank no.
Hylomma species	Accession number
H. aegyptium	KT989614
H. aegyptium	KU130573
H. aegyptium	KY548846
H. aegyptium	KY548847
H. anatolicum	KU130579
H. anatolicum	KU130581
H. anatolicum	MH459383
H. anatolicum	MK462203
H. anatolicum	MN728997
H. dromedarii	AF132822
H. dromedarii	AJ437083
H. dromedarii	KU130588
H. dromedarii	KY548842
H. dromedarii	MH094444
H. excavatum	KU130592
H. excavatum	KU130594
H. excavatum	KX911989
H. impeltatum	KT989629
H. impeltatum	KT989631
H. impeltatum	KU130599
H. impeltatum	KU130600
H. impressum	KU130602
H. impressum	KU130603
H. lusitanicum	EU827698
H. lusitanicum	EU827719
H. lusitanicum	KU130609
H. lusitanicum	MG855655
H. lusitanicum	MK946446
H. marginatum	EU827692
H. marginatum	KU130610
H. marginatum	KU130611
H. marginatum	KU130612
H. marginatum	KX000630
H. marginatum	KX000631
H. marginatum	KX000632
H. marginatum	KX000633
H. marginatum	KX000634
H. marginatum	KX000635
H. marginatum	KX000636
H. marginatum	KX000637
H. marginatum	KX000639
H. marginatum	KX000640
H. marginatum	KX000642
H. marginatum	KX000644
H. marginatum	KX000645
H. marginatum	KX000646
H. marginatum	KX000647
H. marginatum	KX000648
H. marginatum	KX000649
H. marginatum	KX000650
H. marginatum	KX000651
H. marginatum	KY548844
H. rufipes	AJ437091
H. rufipes	AJ437100
H. rufipes	JX049280
H. rufipes	JX049310
H. rufipes	KU130621
H. rufipes	KU130624
H. rufipes	KU130625
H. rufipes	KX000643
H. rufipes	KY548845
H. rufipes	MK648422
H. scupense	KT598361
H. scupense	KU130633
H. scupense	KU130635
H. scupense	KU130636
H. scupense	KX000638
H. truncatum	AF132824
H. truncatum	AJ437085
H. truncatum	AJ437088
H. truncatum	KT999434
H. truncatum	KU130642
H. turanicum	KU130646
H. turanicum	KU130647
H. turanicum	KU130648
H. turanicum	KU130649
H. turanicum	MH094478
